# Supplementary material
Source: publisher site journal article supplement (https://www.spandidos-publications.com/3354/downloadSupplementary)

Figure S1. Transfection efficiency of miR-16 and TLR4 in NHBE cells. (A) Expression levels of miR-16: i) The levels of miR-16 was upregulated after cells were transfected with the miR-16 mimic compared with miR-NC; ii) miR-16 expression was downregulated in LPS-treated NHBE cells, which was reversed by transfection with the miR-16 mimic compared with the miR-NC + LPS group; and iii) transfection with pcDNA3.1-TLR4 alone exerted no significant effects on the expression levels of miR-16 regardless of LPS presence. (B) Expression levels of TLR4: i) Without LPS treatment, the protein expression levels of TLR4 was significantly increased in NHBE following pcDNA-TLR4 transfection compared with the pcDNA3.1-NC group; ii) in the absence of LPS treatment, TLR4 expression was significantly downregulated by miR-16 mimic transfection in NHBE cells compared with the miR-NC group; iii) There was no significant effect on TLR4 expression after stimulation by LPS alone; iv) TLR4 protein expression was significantly increased in LPS-treated NHBE cells following pcDNA-TLR4 transfection compared with the pcDNA3.1-NC + LPS group; and v) TLR4 expression was decreased in LPS-treated NHBE cells following miR-16 mimic and pcDNA3.1-TLR4 co-transfection compared with the pcDNA3.1-TLR4 + LPS group miR, microRNA; TLR4, toll-like receptor 4; NHBE, normal human bronchial epithelial cells; LPS, lipopolysaccharide. \*P<0.05. LPS, lipopolysaccharide; miR, microRNA; NC, negative control; TLR4, toll-like receptor 4; NHBE, normal human bronchial epithelial.

A

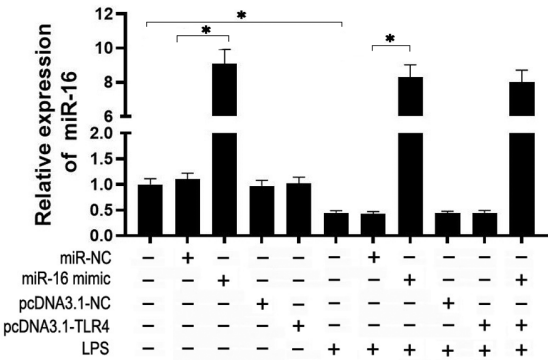

B

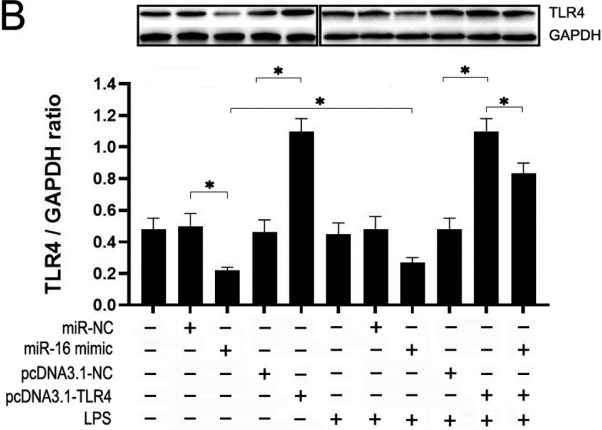

Supplement: Supplementary file 1 [file downloadSupplementary]
